# Supplementary material for: eRF1 mediates codon usage effects on mRNA translation efficiency through premature termination at rare codons
Source: Oxford University Press journal article supplement (doi:10.1093/nar/gkz710), 2019-08-03

## Supplemental Figures

Figure S1. Quantification of [<sup>35</sup>S]-Met-labeled protein bands of indicated Figures in Figure 2 and 3 by ImageJ.

Figure S2. (A) [<sup>35</sup>S]-Met-labeled total translation products of WT *Luc* mRNA showing that the polypeptide species are stable after the addition of CHX. (B) Top panel: A diagram showing the stop-codon-less mRNA (StoplessNLUC), which contains N-terminus luciferase sequence (223 aa) with no stop codon followed by a 30 nt poly(A) tail. Bottom panel: [<sup>35</sup>S]-Met-labeled total translation products of the *StoplessNLUC* mRNA. After 10 min of translation, reactions were terminated by addition of cycloheximide or RNase A. Ribosome-associated nascent peptides were separated by sucrose cushion centrifugation. Sup: supernatant.

Figure S3. Expression level of eGFP-2A-LUC reporter constructs. (A) A long exposure of western blot result in Figure 4D. (B) Relative mRNA levels from eGFP-2A-OPT and eGFP-2A-WT reporter constructs measured by RT-qPCR. Data are means  $\pm$  SD. \*P < 0.05. \*\*P < 0.01.

Figure S4. [<sup>35</sup>S]-Met-labeled total translation products of WT or OPT *Luc* mRNA in cell-free translation extracts prepared from the wild-type and *dom34<sup>KO</sup>* strains.

Figure S5. (A) [<sup>35</sup>S]-Met-labeled in vitro translation products of the WT *Luc* mRNA using the WT *Neurospora* cell extracts in the presence of different concentrations of WT or mutant eRF1 proteins. 1x indicates 0.6  $\mu$ M of eRF1. A short exposure of result in

Figure 6C is shown. (B) [<sup>35</sup>S]-Met-labeled translation products of the WT *Luc* mRNA with the addition of GGQ mutant eRF1. RNase A (1 μg/μl) was added after 15 min of translation. (C) Quantification of the relative total levels of the full-length peptide and the full-length peptidyl-tRNA from independent experiments described in Figure 6C. Data are means ± SD. \*\*P < 0.01. \*\*\*\* P < 0.0001. ns: not significant.

Figure S6. (A) RT-qPCR results showing the relative *eRF1* mRNA levels from the wild-type or eRF1-KD strains. Data are means ± SD. \*\*\*P < 0.001. (B) Real-time luciferase activity of WT *Luc* mRNA in cell-free translation extracts prepared from the wild-type or eRF1 knock-down strains. Recorded relative light units (RLUs) were plotted versus translation reaction time in 1-min intervals. Times of first appearance are indicated by arrows. Data are represented as mean ± SD. (C) Relative mRNA levels from OPT and M-WT reporter construct strains measured by RT-qPCR. Data are means ± SD. \*ns: not significant.

# Figure S1

**A**

- OPT  
- 171-190 181-200 191-210 201-220

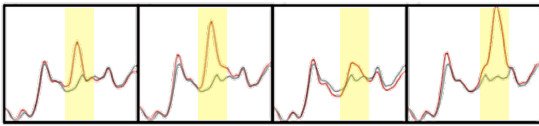

Related to  
Figure 2B

**B**

- 201-220 P221 H212 R213 T214 A215

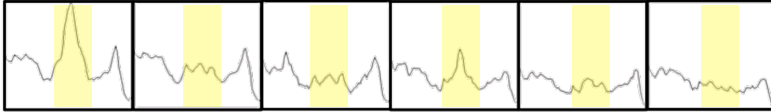

Related to  
Figure 2C

**C**

- OPT  
- R188CGA R223CGA R261CGA R267CGA R275CGA

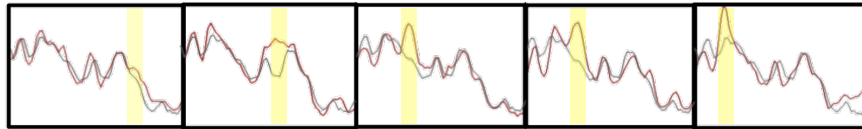

Related to  
Figure 2D

**D**

- 1 3 3 4 4 5  
- 2 3 3 4 4 5

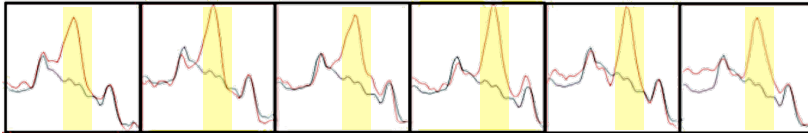

Related to  
Figure 2E

**E**

- OPT WT (274-285) WT  
- S284UCC Q283CAG A285GCC

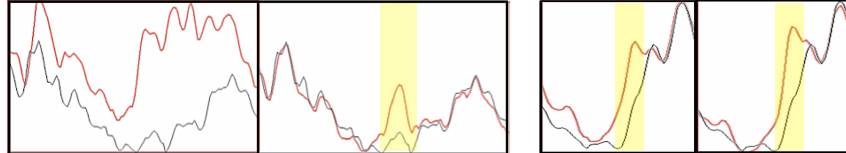

Related to  
Figure 3A

**F**

- 1 3 4 5  
- 2 3 4 5

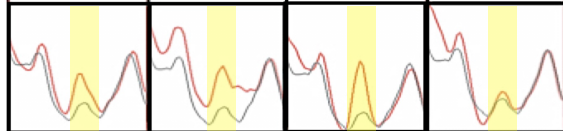

Related to  
Figure 3B  
Left panel

**G**

- 1 L277A E278A\* D279A Y280A K281A I282A\* Q283A\*  
- 2 L277A E278A\* D279A Y280A K281A I282A\* Q283A\*

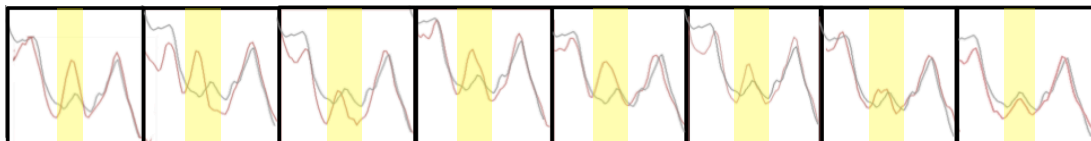

Related to  
Figure 3B  
Right panel

# Figure S2

## A

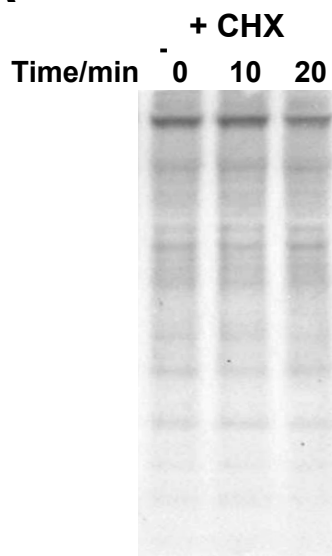

## B

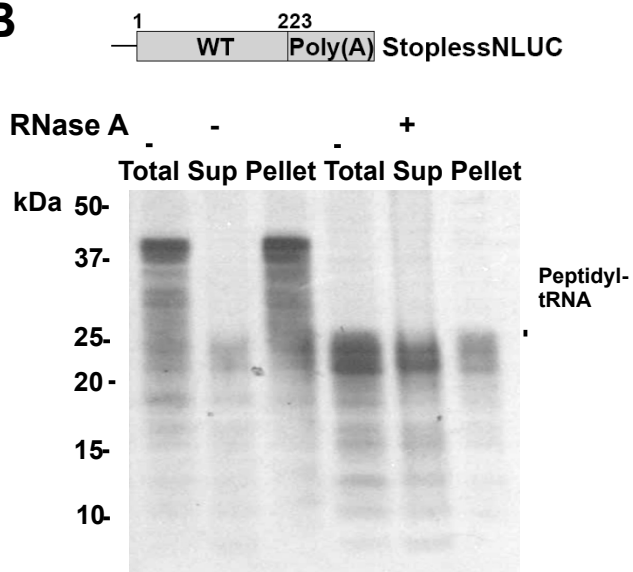

**Figure S3**

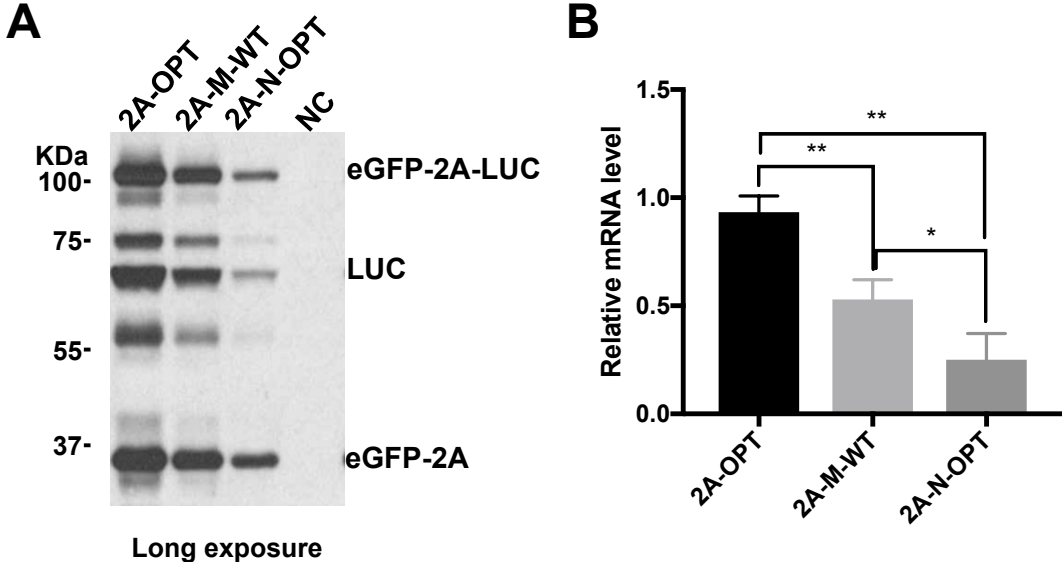

# Figure S4

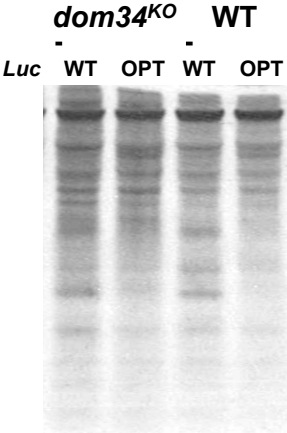

**Figure S5**

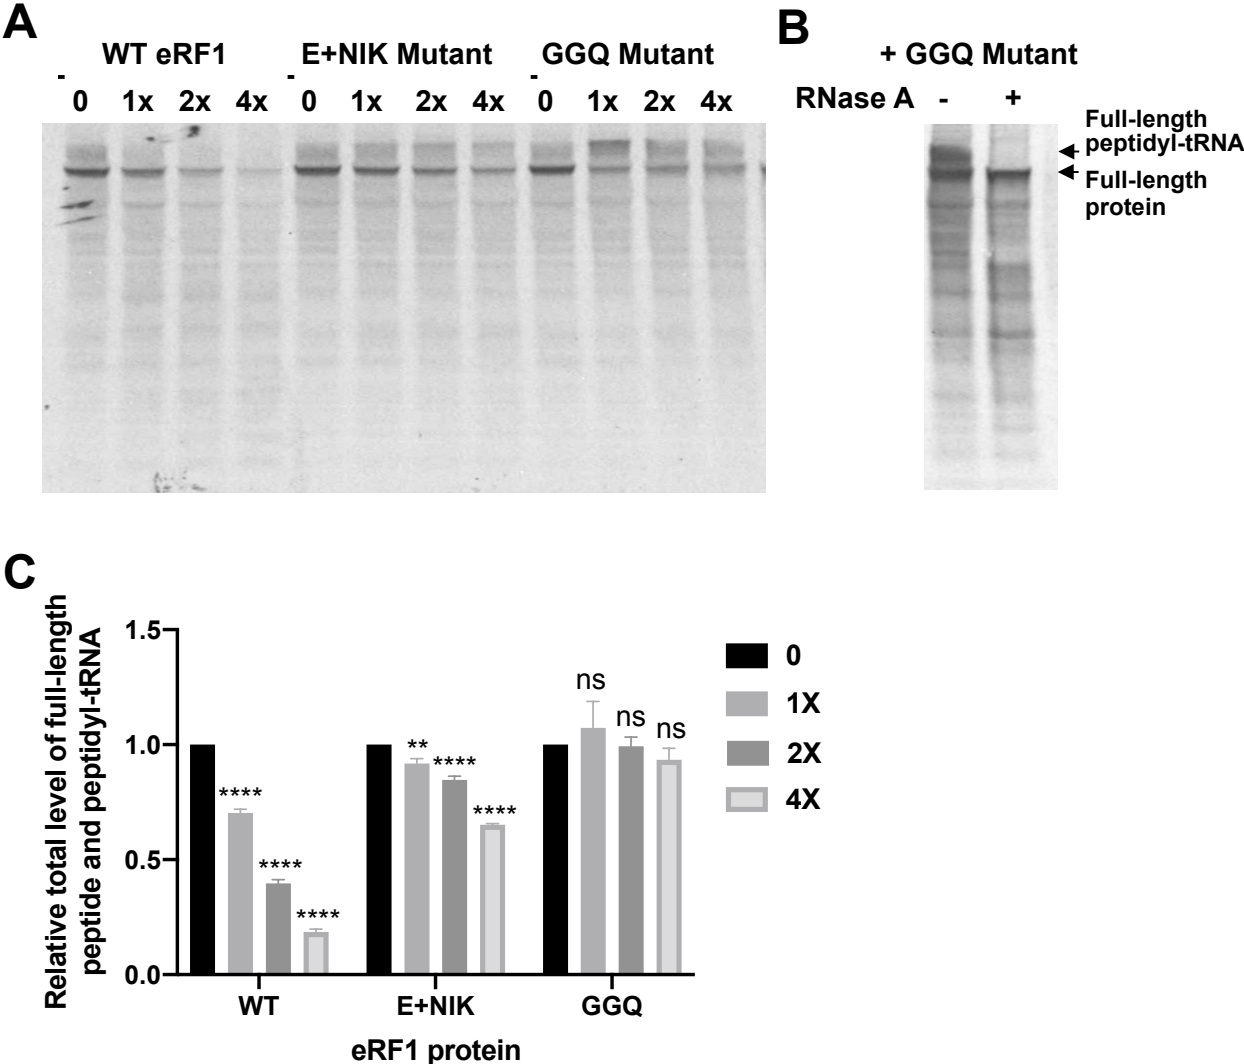

Figure S6

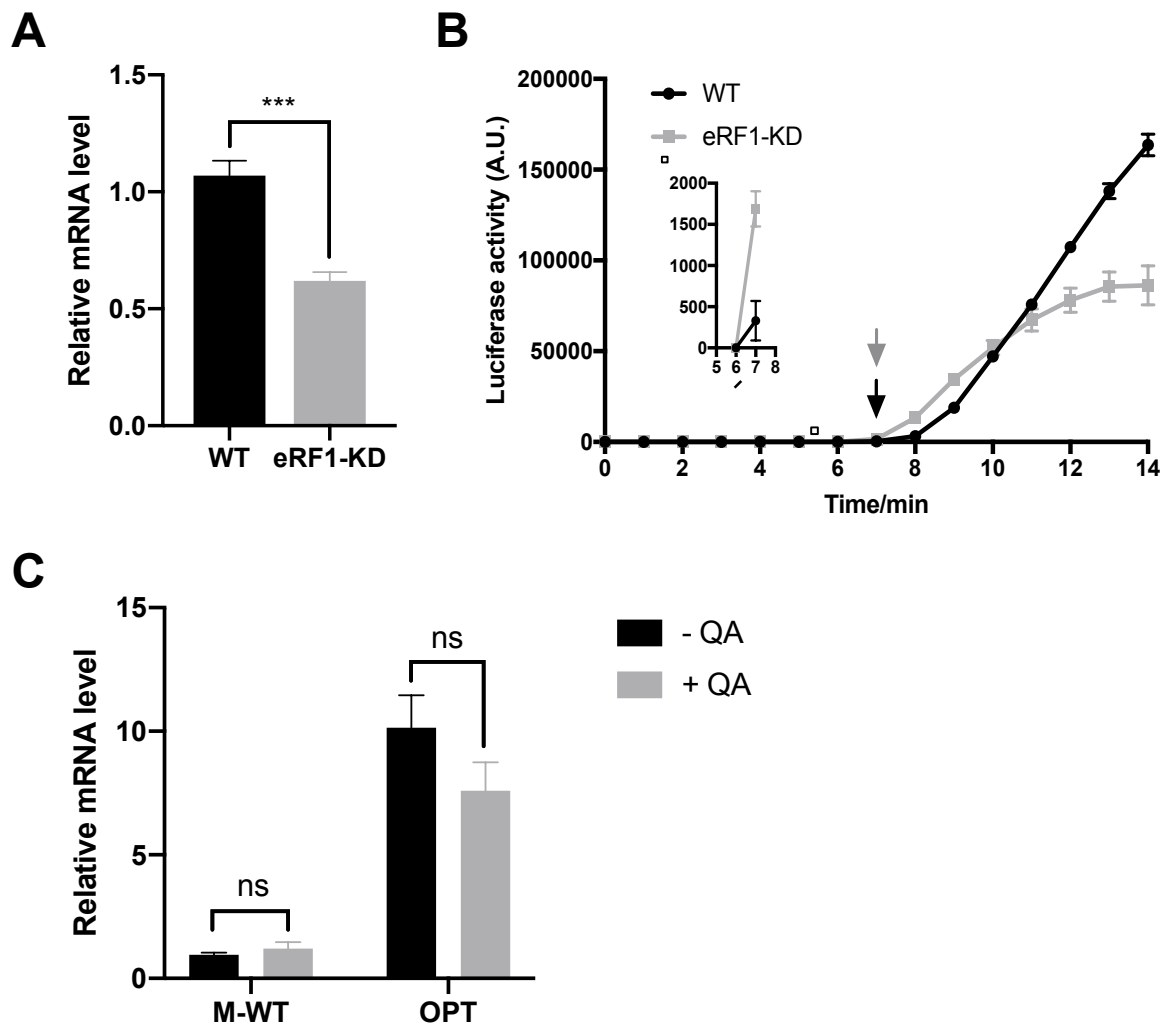

Supplement: gkz710_supplemental_file.pdf [file gkz710_supplemental_file.pdf]
